# Supplementary material
Source: PubMed Central journal article supplement (PMC2934925)

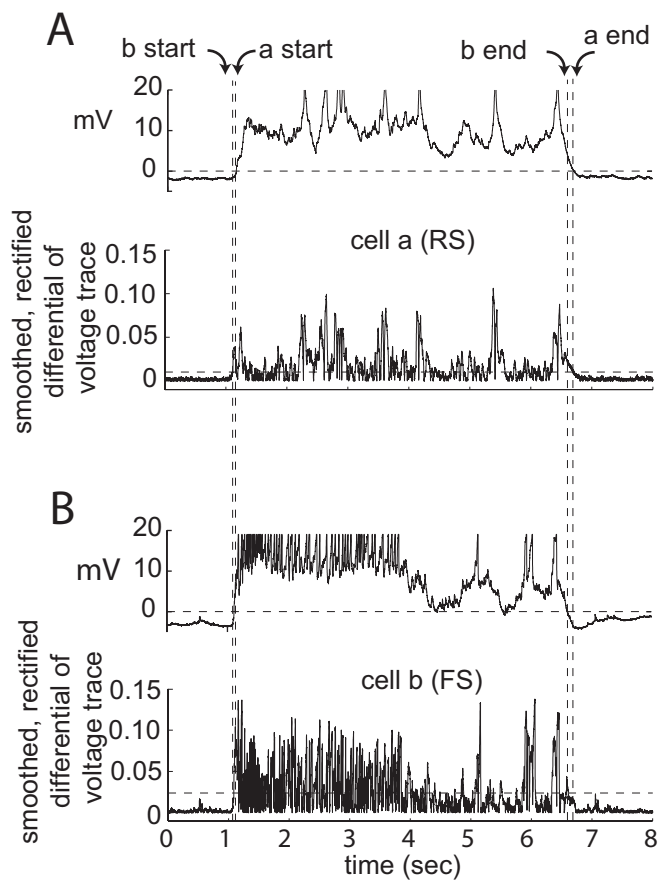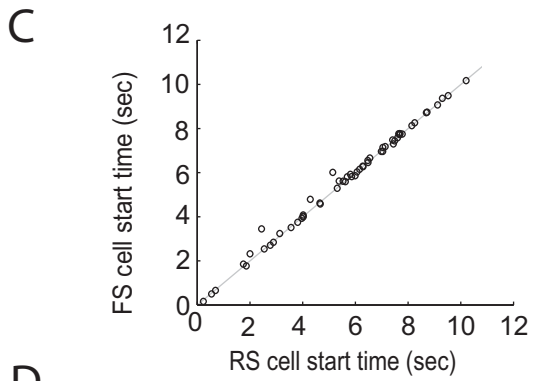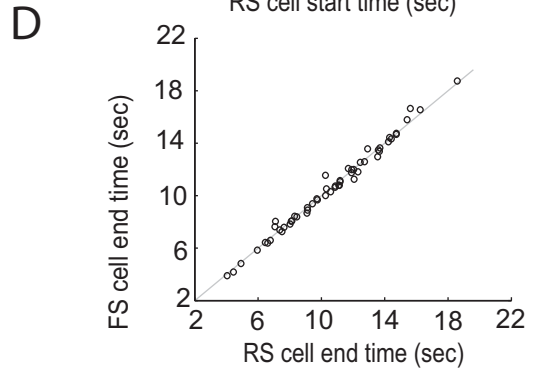

Supplement: 00206.2010_1.pdf [file 00206.2010_1.pdf]

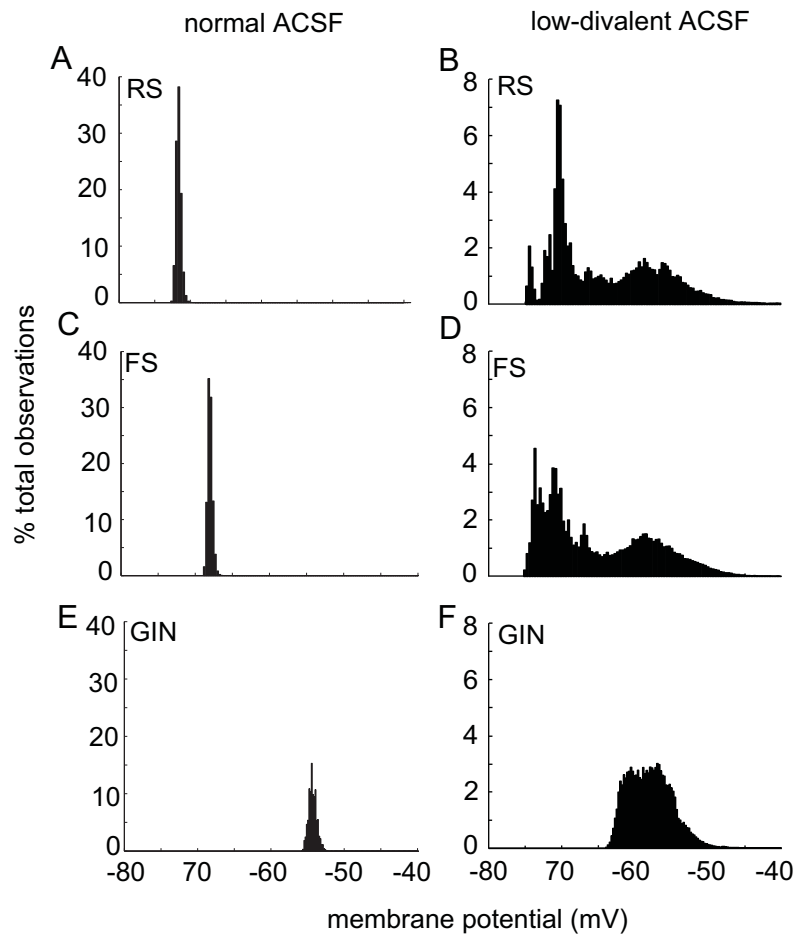

Supplement: 00206.2010_2.pdf [file 00206.2010_2.pdf]

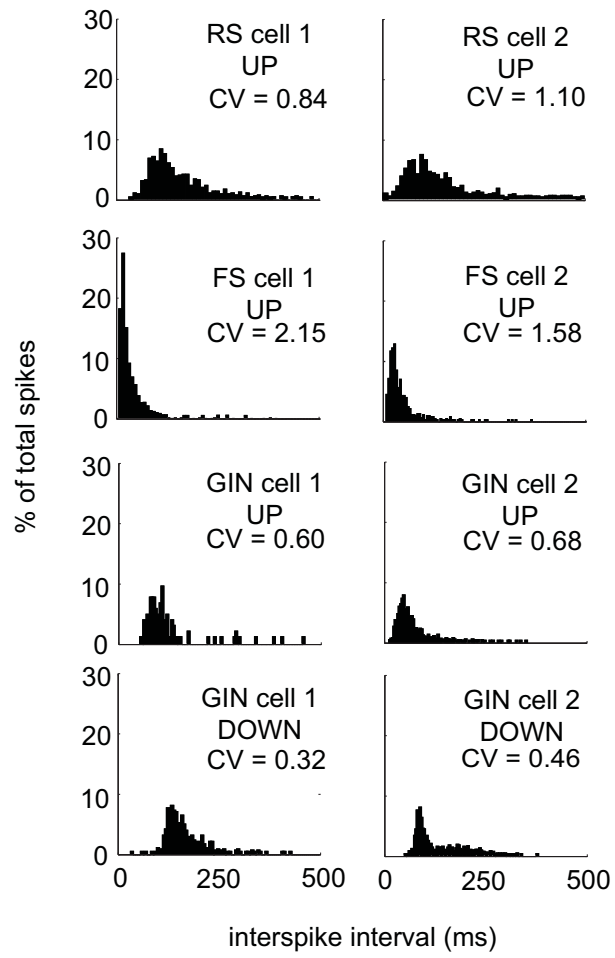

Supplement: 00206.2010_3.pdf [file 00206.2010_3.pdf]

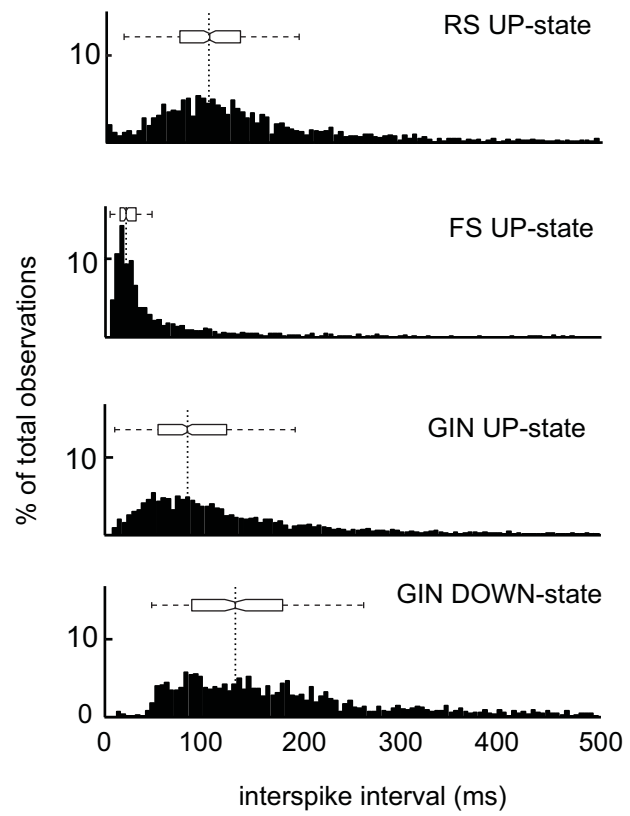

Supplement: 00206.2010_4.pdf [file 00206.2010_4.pdf]

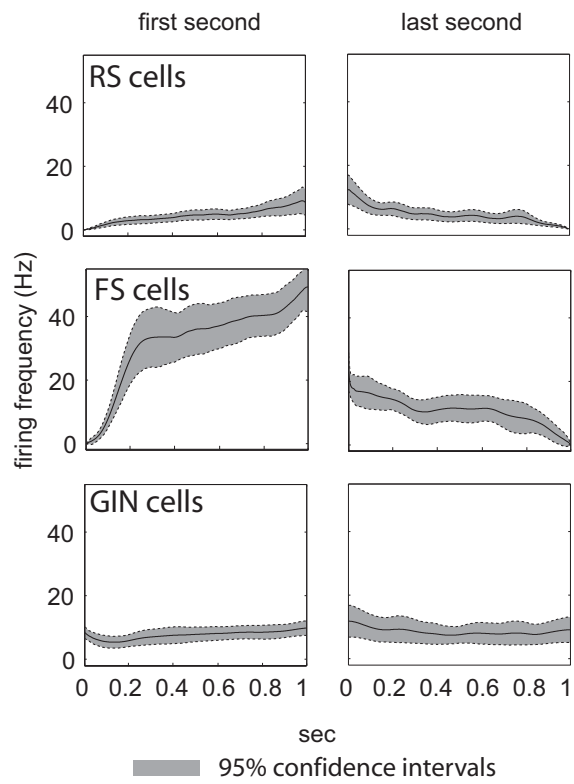

Supplement: 00206.2010_5.pdf [file 00206.2010_5.pdf]
